# Supplementary material
Source: PubMed Central journal article supplement (PMC3308750)
Supplement: supp_M111.310367_Appendix.pdf [file supp_M111.310367_Appendix.pdf]

## APPENDIX

Hypothesis:  $k_1$ ,  $k_1'$ ,  $k_3$ , and  $k_3'$  are pH-independent.

At (a) constant  $\text{pH}_{\text{cyt}} 7.5$  the  $K_M$  value increases upon a change from  $\text{pH}_{\text{vac}} 7.5$  to  $\text{pH}_{\text{vac}} 5.5$  whereas at (b) constant  $\text{pH}_{\text{cyt}} 5.5$  it drops.

$$(a) \quad K_M^{7.5\text{cyt}/7.5\text{vac}} < K_M^{7.5\text{cyt}/5.5\text{vac}}$$

$$\Rightarrow \frac{k_1'k_3+k_3(k_1 \cdot 10^{-7.5})^{c1}+k_1'(k_3' \cdot 10^{-7.5})^{c1}}{k_3+(k_1 \cdot 10^{-7.5})^{c1}+(k_3' \cdot 10^{-7.5})^{c1}} < \frac{k_1'k_3+k_3(k_1 \cdot 10^{-7.5})^{c2}+k_1'(k_3' \cdot 10^{-5.5})^{c2}}{k_3+(k_1 \cdot 10^{-7.5})^{c2}+(k_3' \cdot 10^{-5.5})^{c2}}$$

$$\Rightarrow k_1'k_3(k_1 \cdot 10^{-7.5})^{c2} + (k_3)^2(k_1 \cdot 10^{-7.5})^{c1} + k_3(k_1 \cdot 10^{-7.5})^{c1}(k_3' \cdot 10^{-5.5})^{c2} + k_1'(k_3' \cdot 10^{-7.5})^{c1}(k_1 \cdot 10^{-7.5})^{c2} < k_1'k_3(k_1 \cdot 10^{-7.5})^{c1} + (k_3)^2(k_1 \cdot 10^{-7.5})^{c2} + k_3(k_1 \cdot 10^{-7.5})^{c2}(k_3' \cdot 10^{-7.5})^{c1} + k_1'(k_3' \cdot 10^{-5.5})^{c2}(k_1 \cdot 10^{-7.5})^{c1}$$

$$\Rightarrow (k_3 - k_1') \left[ k_3 (k_1 \cdot 10^{-7.5})^{c1} - k_3 (k_1 \cdot 10^{-7.5})^{c2} + (k_1 \cdot 10^{-7.5})^{c1} (k_3' \cdot 10^{-5.5})^{c2} - (k_1 \cdot 10^{-7.5})^{c2} (k_3' \cdot 10^{-7.5})^{c1} \right] < 0$$

$$\Rightarrow (k_3 - k_1') (k_1 \cdot 10^{-7.5})^{c1} \cdot \left[ k_3 \left( 1 - \frac{(k_1 \cdot 10^{-7.5})^{c2}}{(k_1 \cdot 10^{-7.5})^{c1}} \right) + (k_3' \cdot 10^{-5.5})^{c2} \left( 1 - \frac{(k_1 \cdot 10^{-7.5})^{c2}}{(k_1 \cdot 10^{-7.5})^{c1}} \frac{(k_3' \cdot 10^{-7.5})^{c1}}{(k_3' \cdot 10^{-5.5})^{c2}} \right) \right] < 0$$

$$\Rightarrow (k_3 - k_1') (k_1 \cdot 10^{-7.5})^{c1} \cdot \left[ k_3 \left( 1 - (k_1 \cdot 10^{-7.5})^{-(c1-c2)} \right) + (k_3' \cdot 10^{-5.5})^{c2} \left( 1 - \frac{1}{100^{c2}} \left( \frac{k_3'}{k_1} \right)^{(c1-c2)} \right) \right] < 0 \quad (\text{Eq. A1})$$

Similarly, it follows for (b)  $K_M^{5.5\text{cyt}/7.5\text{vac}} > K_M^{5.5\text{cyt}/5.5\text{vac}}$

$$\Rightarrow (k_3 - k_1') (k_1 \cdot 10^{-5.5})^{c1} \cdot \left[ k_3 \left( 1 - (k_1 \cdot 10^{-5.5})^{-(c1-c2)} \right) + (k_3' \cdot 10^{-5.5})^{c2} \left( 1 - \frac{1}{100^{c1}} \left( \frac{k_3'}{k_1} \right)^{(c1-c2)} \right) \right] > 0 \quad (\text{Eq. A2})$$

Our experiments show that  $c1 > c2$ . The pump cycle has a preference for pumping from the cytosol into the vacuolar lumen. Therefore,  $k_3' < k_1$  is a reasonable estimation. Consequently, it holds for the terms in square brackets in Eqs. A1 and A2: [...] > 0. Thus, the equations can only be fulfilled if

- (a)  $k_1' > k_3$
- (b)  $k_1' < k_3$

This, however, is a contradiction to the assumption that all four rate-constants are pH-independent.

Conclusion: The hypothesis is wrong. Thus, at least one of the constants  $k_1$ ,  $k_1'$ ,  $k_3$ , and/or  $k_3'$  must be pH-dependent. For instance,  $k_1'$  may decrease upon a drop of  $\text{pH}_{\text{cyt}}$  (and/or  $k_1$  increases) while  $k_3$  increases upon an increase of  $\text{pH}_{\text{vac}}$  (and/or  $k_3'$  decreases). This would mean that an increasing proton

concentration would favor the binding of protons to the protein and full dissociation might not be achieved in each pump cycle.
