# Supplementary material
Source: PubMed Central journal article supplement (PMC3308750)

**SUPPLEMENTAL FIGURE 1. V-ATPase-mediated proton pump currents from wild type and mutant vacuoles.** *A.* Typical ATP-triggered proton-current traces given by the upward deflection of the current baseline were strongly reduced in the V-ATPase mutants *det 3-1* and *vha-a2 vha-a3* compared to wild type (WT). *B.* The averaged ATP-induced current responses from the mutant vacuoles were given relative to those from wild type vacuoles. Number of experiments (n) is indicated. Experiments in *A* & *B* were performed with symmetrical ionic conditions at pH of 7.5. Measurements of *vha-a2 vha-a3* additionally contained 2 mM DTT. The mean value for WT (n=11;  $2.4 \pm 0.08$  pA/pF) in *B* is composed of measurements performed in the presence of 2 mM DTT (n = 5;  $2.5 \pm 0.04$  pA/pF) and absence of DTT (n = 6;  $2.4 \pm 0.1$  pA/pF).

SUPPLEMENTAL FIGURE 1.

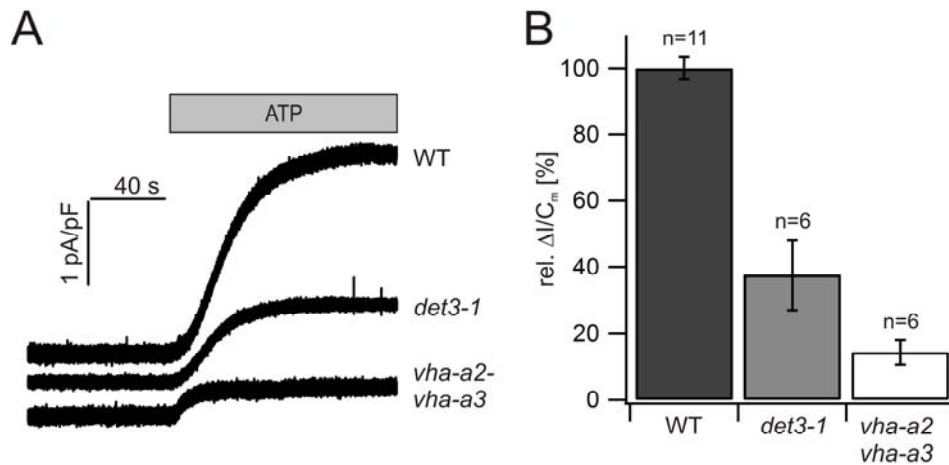

Supplement: supp_M111.310367_jbc.M111.310367-1.pdf [file supp_M111.310367_jbc.M111.310367-1.pdf]
